# Supplementary material for: Genetic Diversity of Dengue Virus in Clinical Specimens from Bangkok, Thailand, during 2018–2020: Co-Circulation of All Four Serotypes with Multiple Genotypes and/or Clades
Source: MDPI journal article supplement (doi:10.3390/tropicalmed6030162), 2021-09-04
Supplement: s1 [file s1]

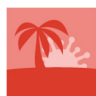

Article

# Genetic Diversity of Dengue Virus in Clinical Specimens from Bangkok, Thailand, during 2018–2020: Co-Circulation of All Four Serotypes with Multiple Genotypes and/or Clades

Kanaporn Poltep <sup>1,2,3</sup>, Juthamas Phadungsombat <sup>2,4</sup>, Emi E. Nakayama <sup>2,4</sup>, Nathamon Kosoltanapiwat <sup>1</sup>, Borimas Hanboonkunupakarn <sup>5</sup>, Witthawat Wiriyaat <sup>3</sup>, Tatsuo Shioda <sup>2,4,\*</sup> and Pornsawan Leungwutiwong <sup>1,\*</sup>

<sup>1</sup> Department of Microbiology and Immunology, Faculty of Tropical Medicine, Mahidol University, Bangkok 10400, Thailand; kanaporn.pol@gmail.com (K.P.); nathamon.kos@mahidol.ac.th (N.K.)

<sup>2</sup> Mahidol-Osaka Center for Infectious Diseases (MOCID), Faculty of Tropical Medicine, Mahidol University, Bangkok 10400, Thailand; juthamas@biken.osaka-u.ac.jp (J.P.); emien@biken.osaka-u.ac.jp (E.E.N.)

<sup>3</sup> The Monitoring and Surveillance Center for Zoonotic Diseases in Wildlife and Exotic Animals, Faculty of Veterinary Science, Mahidol University, Nakhon Pathom, 73170, Thailand; witthawat.wir@mahidol.edu

<sup>4</sup> Department of Viral Infections, Research Institute for Microbial Diseases (RIMD), Osaka University, Osaka 565-0871, Japan

<sup>5</sup> Department of Clinical Tropical Medicine, Faculty of Tropical Medicine, Mahidol University, Bangkok 10400, Thailand; borimas.han@mahidol.ac.th

\* Correspondence: shioda@biken.osaka-u.ac.jp (T.S.) and pornsawan.lea@mahidol.ac.th (P.L.)

**Citation:** Poltep, K.; Phadungsombat, J.; Nakayama, E.E.; Kosoltanapiwat, N.; Hanboonkunupakarn, B.; Wiriyaat, W.; Shioda, T.; Leungwutiwong, P. Genetic Diversity of Dengue Virus in Clinical Specimens from Bangkok, Thailand, during 2018–2020: Co-Circulation of All Four Serotypes with Multiple Genotypes and/or Clades. *Trop. Med. Infect. Dis.* **2021**, *6*, 162. <https://doi.org/10.3390/tropicalmed6030162>

Academic Editor: John McBride

Received: 13 August 2021

Accepted: 1 September 2021

Published: 4 September 2021

**Publisher's Note:** MDPI stays neutral with regard to jurisdictional claims in published maps and institutional affiliations.

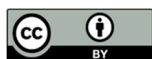

**Copyright:** © 2021 by the authors. Licensee MDPI, Basel, Switzerland. This article is an open access article distributed under the terms and conditions of the Creative Commons Attribution (CC BY) license (<http://creativecommons.org/licenses/by/4.0/>).

## Supplementary

**Table S1.** Primers used for whole-genome sequencing and sample preparation.

| Fragment | RT primer              | Sequence 5'-3'                                         | PCR primer                                                   | Sequence 5'-3'                                                                                     |
|----------|------------------------|--------------------------------------------------------|--------------------------------------------------------------|----------------------------------------------------------------------------------------------------|
| DENV1-5  | d1a10 <sup>a</sup>     | TCTCTCYGGCTCRAAGAGGG                                   | d1s1C <sup>a</sup><br>d1a10 <sup>a</sup>                     | <u>GATGAGGGAAGATGGGGAGTTGTTAGTCTACGTGGAC</u><br>TCTCTCYGGCTCRAAGAGGG                               |
| DENV1-3  | d1a5B <sup>a</sup>     | <u>TTTGTCGGTCTGGGGGGGTAT</u> AGAACCTGTTGATTCA<br>ACRGC | d1s12 <sup>a</sup><br>d1a5B <sup>a</sup>                     | AAATGGCAGAGGCGCTCAAGGG<br><u>TTTGTCGGTCTGGGGGGGTAT</u> AGAACCTGTTGATTCAACRGC                       |
| DENV2-5  | DV2RT6817 <sup>b</sup> | TGCGGCCACCACTGTGAGGATGGC                               | T7-5TDVFwClal <sup>b</sup><br>DV2RvNhel6731NotI <sup>b</sup> | GGCATCGATTAATACGACTCACTATAGAGTTGTTAGTCTACGTGGACCGACA<br>AAG<br>GGCGCGGCCGCAGCAAACTATGAGAAAAAACTCCA |
| DENV2-3  | 3T DV Rv <sup>b</sup>  | AGAACCTGTTGATTCAACAGCACC                               | DV2FwClal6608Nhel <sup>b</sup><br>3T-NotI DV Rv <sup>b</sup> | GGCATCGATAGGGAAGATGACCCTGGGAATGTG<br>GCCGCGGCCGCAGAACCTGTTGATTCAACAGCACC                           |

Underlying represent restriction sites or T7 promoter sequences that are not present in dengue virus genomes. <sup>a</sup>Christenbury, J. G., 2010. <sup>b</sup>Kurosu, T., 2010.

**Table S2.** Primers used for complete envelope-regions sequencing and sample preparation.

| Fragment |             | Antisense-primers  | Sequence 5'-3'           | Sense-primers      | Sequence 5'-3'                               |
|----------|-------------|--------------------|--------------------------|--------------------|----------------------------------------------|
| DENV1-E  | One-Step RT | d1a17 <sup>a</sup> | CCAATGGCYGCTGAYAGTCT     | d1s1C <sup>a</sup> | <u>GATGAGGGAAGATGGGGAGTTGTTAGTCTACGTGGAC</u> |
|          | Nested PCR  | d1a17 <sup>a</sup> | CCAATGGCYGCTGAYAGTCT     | d1s3 <sup>a</sup>  | ATAAACGTTCTGTCGCATTGGC                       |
|          | Sequencing  | d1a17 <sup>a</sup> | CCAATGGCYGCTGAYAGTCT     | d1s3 <sup>a</sup>  | ATAAACGTTCTGTCGCATTGGC                       |
|          |             | 1371R <sup>c</sup> | TCCAGTGTGGACGGTGACTA     | d1s4 <sup>a</sup>  | TGTGTGTCGACGAACATT                           |
|          |             |                    |                          | d1s5 <sup>a</sup>  | GCAATGCAYACTGCGTTG                           |
| DENV2-E  | One-Step RT | 2447R              | TTCCAGCTCACAACGCAACCAC   | d2s1C <sup>a</sup> | <u>GATGAGGGAAGATGGGGAGTTGTTAGTCTACGTGGAC</u> |
|          | Nested PCR  | 2447R              | TTCCAGCTCACAACGCAACCAC   | 618F               | ACCAGAAGACATAGAYTGTGGTG                      |
|          | Sequencing  | 2447R              | TTCCAGCTCACAACGCAACCAC   | 911F               | TGACAGCTGTCGCTCCTTCAATG                      |
|          |             | 1631R <sup>d</sup> | ATACAGAARGARACATTGGTC    | 1577F              | TAGACCTGCCATTACCATG                          |
|          |             | 1602R              | CGGAGCAGACACACAAGGAT     | d2seq4             | RGGTGACACAGCCTGGGA                           |
| DENV3-E  | One-Step RT | DV3R               | CCACAACCTACCGTTAATTGAT   | d3s1C <sup>a</sup> | <u>GATGAGGGAAGATGGGGAGTTGTTAGTCTACGTGGAC</u> |
|          | Nested PCR  | DV3R               | CCACAACCTACCGTTAATTGAT   | 815F <sup>e</sup>  | GCCCTTAGGCACCCAGGGTT                         |
|          | Sequencing  | DV3R               | CCACAACCTACCGTTAATTGAT   | 815F <sup>e</sup>  | GCCCTTAGGCACCCAGGGTT                         |
|          |             |                    |                          | E2F <sup>f</sup>   | CGGTTGTGGTTTGTGG                             |
|          |             |                    |                          | Seq2C <sup>f</sup> | GCCATCTTGGGAGACA                             |
|          |             |                    |                          | d3s4 <sup>a</sup>  | GAAGAACAAGCATGGATGGTA                        |
|          |             |                    |                          | d3s5 <sup>a</sup>  | TGAACCTCCTTTGGGGAA                           |
|          |             |                    |                          | 1977F              | GACTGATCACAGCCAACCCA                         |
| Fragment |             | Antisense-primers  | Sequence 5'-3'           | Sense-primers      | Sequence 5'-3'                               |
| DENV4-E  | One-Step RT | d4a18 <sup>a</sup> | GGGCATTYAATATTGCAGACGCTA | D41F               | AGTTGTTAGTCTACGTGGACCGACAA                   |
|          | Nested PCR  | d4a18 <sup>a</sup> | GGGCATTYAATATTGCAGACGCTA | d4EF1              | CTAATGATGCTGGTCGCCC                          |
|          | Sequencing  | d4a18 <sup>a</sup> | GGGCATTYAATATTGCAGACGCTA | d4EF1              | CTAATGATGCTGGTCGCCC                          |
|          |             | d4a6 <sup>a</sup>  | TGGGTGTCTCCATTGTGGACTG   | d4s3 <sup>a</sup>  | TTTGAAGTACGACGACACAGC                        |
|          |             |                    |                          | d4s4 <sup>a</sup>  | TGGACAGCAGGAGCAGACACAT                       |
|          |             |                    |                          | d4s6 <sup>a</sup>  | GYTCCATTGGCAAGATGTTTGAG                      |

Underlying represent restriction sites or T7 promoter sequences that are not present in dengue virus genomes. <sup>a</sup> Christenbury, J. G., 2010. <sup>b</sup> Kurosu, T., 2010. <sup>c</sup> Hamel, R., 2019. <sup>d</sup> Singh, S., 2015. <sup>e</sup> Phommanivong, V., 2016. <sup>f</sup> Luo, L., 2013.

**Table S3.** Sequences of the envelope region from GenBank used in phylogenetic analysis.

| Serotype | Genotype | Accession Number | Country            | Year |
|----------|----------|------------------|--------------------|------|
| DENV-1   | I        | AB074760.1       | Japan              | 1943 |
| DENV-1   | I        | AF350498.1       | China              | 1980 |
| DENV-1   | I        | AY732481.1       | Thailand           | 1982 |
| DENV-1   | I        | AY732477.1       | Thailand           | 1991 |
| DENV-1   | I        | AY732475.1       | Thailand           | 1994 |
| DENV-1   | I        | AY732479.1       | Thailand           | 2001 |
| DENV-1   | I        | AY732482.1       | Thailand           | 2001 |
| DENV-1   | I        | AY732480.1       | Thailand           | 2004 |
| DENV-1   | I        | HG316481.1       | Thailand           | 2010 |
| DENV-1   | I        | KX595191.1       | Vietnam            | 2013 |
| DENV-1   | I        | KF887994.1       | Thailand           | 2013 |
| DENV-1   | I        | LC002828.1       | Japan              | 2014 |
| DENV-1   | I        | MK780858.1       | Thailand, Southern | 2016 |
| DENV-1   | I        | MK780859.1       | Thailand, Southern | 2016 |
| DENV-1   | I        | LC410183.1       | Thailand           | 2017 |
| DENV-1   | I        | MN955621.1       | Thailand           | 2018 |
| DENV-1   | I        | MN955622.1       | Thailand           | 2018 |
| DENV-1   | I        | MN955623.1       | Thailand           | 2018 |
| DENV-1   | I        | MN955625.1       | Thailand           | 2018 |
| DENV-1   | I        | MN955629.1       | Thailand           | 2018 |
| DENV-1   | I        | MN955631.1       | Thailand           | 2018 |
| DENV-1   | I        | MN955646.1       | Thailand           | 2018 |
| DENV-1   | I        | MN955648.1       | Thailand           | 2018 |
| DENV-1   | I        | MN955650.1       | Thailand           | 2018 |
| DENV-1   | I        | MN955653.1       | Thailand           | 2018 |
| DENV-1   | I        | MN955657.1       | Thailand           | 2018 |
| DENV-1   | II       | AF180817.1       | Thailand           | 1964 |
| DENV-1   | III      | EF457905.1       | Malaysia           | 1972 |
| DENV-1   | IV       | AB189120.1       | Indonesia          | 1998 |
| DENV-1   | IV       | AY722803.1       | Myanmar            | 1998 |
| DENV-1   | IV       | DQ672562.1       | USA                | 2001 |
| DENV-1   | IV       | DQ285560.1       | Reunion            | 2004 |
| DENV-1   | IV       | GQ868602.1       | Philippines        | 2004 |
| DENV-1   | IV       | KT827366.1       | China              | 2007 |
| DENV-1   | IV       | KC762651.1       | Indonesia          | 2007 |
| DENV-1   | V        | AY732474.1       | Thailand           | 1980 |
| DENV-1   | V        | AF226685.1       | Brazil             | 1990 |
| DENV-1   | V        | AF514889.1       | Argentina          | 2000 |
| DENV-1   | V        | KF289072.1       | India              | 2011 |
| DENV-1   | VI       | KR919820.1       | Brunei             | 2014 |
| DENV-1   | VI       | KT825058.1       | Thailand           | 2013 |
| DENV-1   | I        | MW946024.1       | Thailand           | 1995 |
| DENV-1   | I        | AY732459.1       | Thailand           | 1997 |
| DENV-1   | I        | KY586442.1       | Thailand           | 2003 |
| DENV-1   | I        | MW945811.1       | Thailand           | 2005 |
| DENV-1   | I        | KY586429.1       | Thailand, Bangkok  | 2006 |
| Serotype | Genotype | Accession Number | Country            | Year |

|        |   |            |                   |      |
|--------|---|------------|-------------------|------|
| DENV-1 | I | JF967810.1 | Myanmar           | 2008 |
| DENV-1 | I | JF967796.1 | Malaysia          | 2008 |
| DENV-1 | I | HQ591537.1 | Vietnam           | 2008 |
| DENV-1 | I | LC148025.1 | Cambodia          | 2008 |
| DENV-1 | I | JF960220.1 | Singapore         | 2010 |
| DENV-1 | I | MG564072.1 | Thailand          | 2011 |
| DENV-1 | I | JQ048541.1 | China             | 2011 |
| DENV-1 | I | LC148030.1 | Maldives          | 2011 |
| DENV-1 | I | MF033202.1 | Singapore         | 2012 |
| DENV-1 | I | KY818153.1 | Malaysia          | 2012 |
| DENV-1 | I | KR527488.1 | India             | 2012 |
| DENV-1 | I | KT825058.1 | Thailand          | 2013 |
| DENV-1 | I | MG894763.1 | Taiwan, Thai      | 2013 |
| DENV-1 | I | MW945810.1 | Thailand          | 2013 |
| DENV-1 | I | MW945883.1 | Thailand          | 2013 |
| DENV-1 | I | MW945998.1 | Thailand          | 2013 |
| DENV-1 | I | MW946242.1 | Thailand          | 2013 |
| DENV-1 | I | KU509291.1 | German, Thai      | 2013 |
| DENV-1 | I | KJ806855.1 | Malaysia          | 2013 |
| DENV-1 | I | KJ806941.2 | Singapore         | 2013 |
| DENV-1 | I | KJ806946.2 | Singapore         | 2013 |
| DENV-1 | I | KJ806952.1 | Singapore         | 2013 |
| DENV-1 | I | KR051920.1 | Myanmar           | 2013 |
| DENV-1 | I | MW945942.1 | Thailand          | 2014 |
| DENV-1 | I | KU509313.1 | German, Singapore | 2014 |
| DENV-1 | I | MG894818.1 | Taiwan, Myanmar   | 2014 |
| DENV-1 | I | MG737900.1 | China             | 2015 |
| DENV-1 | I | MF033239.1 | Singapore         | 2015 |
| DENV-1 | I | KX357940.2 | Myanmar           | 2015 |
| DENV-1 | I | MW302772.1 | Myanmar           | 2015 |
| DENV-1 | I | KY672936.1 | China, Yunnan     | 2015 |
| DENV-1 | I | MG894863.1 | Taiwan, Myanmar   | 2015 |
| DENV-1 | I | KT825039.1 | Myanmar           | 2015 |
| DENV-1 | I | MG894893.1 | Taiwan, Vietnam   | 2015 |
| DENV-1 | I | MF033260.1 | Singapore         | 2016 |
| DENV-1 | I | MF033254.1 | Singapore         | 2016 |
| DENV-1 | I | MW302778.1 | China             | 2016 |
| DENV-1 | I | MG894965.1 | China, Vietnam    | 2016 |
| DENV-1 | I | MH729967.1 | Myanmar           | 2017 |
| DENV-1 | I | MG679801.1 | Myanmar           | 2017 |
| DENV-1 | I | MG696656.1 | Myanmar           | 2017 |
| DENV-1 | I | MG840577.1 | China             | 2017 |
| DENV-1 | I | MH594890.1 | India             | 2017 |
| DENV-1 | I | MK529748.1 | China             | 2018 |
| DENV-1 | I | MW014049.1 | Thailand          | 2018 |
| DENV-1 | I | MN933739.1 | China             | 2018 |
| DENV-1 | I | MN921284.1 | China             | 2019 |
| DENV-1 | I | MN921368.1 | China, Cambodia   | 2019 |
| DENV-1 | I | MW228041.1 | Cambodia          | 2019 |
| DENV-1 | I | MN921518.1 | China, Cambodia   | 2019 |
| DENV-1 | I | MT705147.1 | Myanmar           | 2019 |

| Serotype | Genotype | Accession Number | Country         | Year |
|----------|----------|------------------|-----------------|------|
| DENV-1   | I        | MT705153.1       | Myanmar         | 2019 |
| DENV-1   | I        | MT705151.1       | Myanmar         | 2019 |
| DENV-1   | I        | MN960677.1       | China           | 2019 |
| DENV-1   | I        | MN921258.1       | China, Thailand | 2019 |
| DENV-1   | I        | MZ313995.1       | India           | 2021 |
| DENV-2   | American | GQ868592         | Cambodia        | 1986 |
| DENV-2   | Asian I  | MN444620         | Laos            | 2017 |
| DENV-2   | Asian I  | MN955668         | Thailand        | 2018 |
| DENV-2   | Asian I  | KX357982         | Myanmar         | 2015 |
| DENV-2   | Asian I  | MN923120         | China           | 2019 |
| DENV-2   | Asian I  | MT856331         | China           | 2019 |
| DENV-2   | Asian I  | MN955665         | Thailand        | 2018 |
| DENV-2   | Asian I  | MN955667         | Thailand        | 2018 |
| DENV-2   | Asian I  | KX357992         | Myanmar         | 2015 |
| DENV-2   | Asian I  | KX357999         | Myanmar         | 2015 |
| DENV-2   | Asian I  | MT705574         | China           | 2019 |
| DENV-2   | Asian I  | MK780871         | Thailand        | 2015 |
| DENV-2   | Asian I  | MK780873         | Thailand        | 2015 |
| DENV-2   | Asian I  | MN955664         | Thailand        | 2018 |
| DENV-2   | Asian I  | MN955662         | Thailand        | 2018 |
| DENV-2   | Asian I  | MW018159         | China           | 2018 |
| DENV-2   | Asian I  | MN444619         | Laos            | 2018 |
| DENV-2   | Asian I  | MK780876         | Thailand        | 2016 |
| DENV-2   | Asian I  | MK780875         | Thailand        | 2015 |
| DENV-2   | Asian I  | MK780878         | Thailand        | 2016 |
| DENV-2   | Asian I  | MK780870         | Thailand        | 2015 |
| DENV-2   | Asian I  | MG895113         | Taiwan          | 2015 |
| DENV-2   | Asian I  | MK780879         | Thailand        | 2016 |
| DENV-2   | Asian I  | MK780872         | Thailand        | 2015 |
| DENV-2   | Asian I  | KX357978         | Myanmar         | 2015 |
| DENV-2   | Asian I  | MK780874         | Thailand        | 2016 |
| DENV-2   | Asian I  | LC410184         | Thailand        | 2016 |
| DENV-2   | Asian I  | MK780877         | Thailand        | 2016 |
| DENV-2   | Asian I  | LC410186         | Thailand        | 2016 |
| DENV-2   | Asian I  | LC410188         | Thailand        | 2017 |
| DENV-2   | Asian I  | LC410187         | Thailand        | 2017 |
| DENV-2   | Asian I  | MT252647         | Singapore       | 2016 |
| DENV-2   | Asian I  | KX357998         | Myanmar         | 2015 |
| DENV-2   | Asian I  | MN923114         | China           | 2019 |
| DENV-2   | Asian I  | MT856335         | China           | 2018 |
| DENV-2   | Asian I  | MW018160         | Cambodia        | 2018 |
| DENV-2   | Asian I  | MN923122         | China           | 2019 |
| DENV-2   | Asian I  | LC410185         | Thailand        | 2016 |
| DENV-2   | Asian I  | MN955663         | Thailand        | 2018 |
| DENV-2   | Asian I  | MN444611         | Laos            | 2017 |
| DENV-2   | Asian I  | MG895161         | Taiwan          | 2016 |
| DENV-2   | Asian I  | KY495819         | Cambodia        | 2015 |
| DENV-2   | Asian I  | MG895100         | Taiwan          | 2015 |
| DENV-2   | Asian I  | MN955666         | Thailand        | 2018 |
| DENV-2   | Asian I  | MN955661         | Thailand        | 2018 |

| DENV-2   | Asian I        | KU509273         | Thailand   | 2011 |
|----------|----------------|------------------|------------|------|
| Serotype | Genotype       | Accession Number | Country    | Year |
| DENV-2   | Asian I        | KY851468         | Thailand   | 2012 |
| DENV-2   | Asian I        | JF968045         | Thailand   | 2010 |
| DENV-2   | Asian I        | KY882539         | Thailand   | 2013 |
| DENV-2   | Asian I        | KY851471.1       | Thailand   | 2012 |
| DENV-2   | Asian I        | MN448880.1       | Thailand   | 2010 |
| DENV-2   | Asian I        | NC001474         | Thailand   | 1964 |
| DENV-2   | Asian II       | AF038403         | New Guinea | 1944 |
| DENV-2   | Asian II       | GQ398268         | Indonesia  | 1975 |
| DENV-2   | Asian/American | HQ999999         | Guatemala  | 2009 |
| DENV-2   | Cosmopolitan   | MK651226         | Bhutan     | 2016 |
| DENV-2   | Cosmopolitan   | KX061427         | India      | 2015 |
| DENV-2   | Cosmopolitan   | LC436619         | Bangladesh | 2017 |
| DENV-2   | Cosmopolitan   | KT781572         | Thailand   | 2015 |
| DENV-2   | Cosmopolitan   | KY971720         | Vietnam    | 2015 |
| DENV-2   | Cosmopolitan   | MN444609         | Laos       | 2017 |
| DENV-2   | Cosmopolitan   | MN444605         | Laos       | 2015 |
| DENV-2   | Cosmopolitan   | MW320621         | Thailand   | 2015 |
| DENV-2   | Cosmopolitan   | MH891772         | India      | 2017 |
| DENV-2   | Cosmopolitan   | MK858110         | India      | 2016 |
| DENV-2   | Cosmopolitan   | MT856318         | China      | 2019 |
| DENV-2   | Cosmopolitan   | MN923118         | China      | 2019 |
| DENV-2   | Cosmopolitan   | MN982892         | Malaysia   | 2016 |
| DENV-2   | Cosmopolitan   | MT252653         | Singapore  | 2017 |
| DENV-2   | Cosmopolitan   | MN955676         | Thailand   | 2018 |
| DENV-2   | Cosmopolitan   | MN955671         | Thailand   | 2018 |
| DENV-2   | Cosmopolitan   | MN444616         | Laos       | 2018 |
| DENV-2   | Cosmopolitan   | MW295816         | China      | 2020 |
| DENV-2   | Cosmopolitan   | MN018344         | China      | 2017 |
| DENV-2   | Cosmopolitan   | MN444622         | Laos       | 2017 |
| DENV-2   | Cosmopolitan   | MT856326         | China      | 2017 |
| DENV-2   | Cosmopolitan   | MN444615         | Laos       | 2018 |
| DENV-2   | Cosmopolitan   | MK587777         | China      | 2016 |
| DENV-2   | Cosmopolitan   | MN955680         | Thailand   | 2018 |
| DENV-2   | Cosmopolitan   | MN955681         | Thailand   | 2018 |
| DENV-2   | Cosmopolitan   | MN444614         | Laos       | 2018 |
| DENV-2   | Cosmopolitan   | MN955682         | Thailand   | 2018 |
| DENV-2   | Cosmopolitan   | MN955672         | Thailand   | 2018 |
| DENV-2   | Cosmopolitan   | MW295818         | China      | 2020 |
| DENV-2   | Cosmopolitan   | MW345921         | China      | 2020 |
| DENV-2   | Cosmopolitan   | MT856317         | China      | 2019 |
| DENV-2   | Cosmopolitan   | MT856323         | China      | 2019 |
| DENV-2   | Cosmopolitan   | MT252652         | Singapore  | 2017 |
| DENV-2   | Cosmopolitan   | MH010618         | China      | 2017 |
| DENV-2   | Cosmopolitan   | KJ806878         | Malaysia   | 2012 |
| DENV-2   | Cosmopolitan   | MN444617         | Laos       | 2019 |
| DENV-2   | Cosmopolitan   | MN923132         | China      | 2018 |
| DENV-2   | Cosmopolitan   | LC410189         | Thailand   | 2016 |
| DENV-2   | Cosmopolitan   | KY495805         | Thailand   | 2016 |
| DENV-2   | Cosmopolitan   | MG737956         | China      | 2015 |

| DENV-2   | Cosmopolitan | MN955677         | Thailand  | 2018 |
|----------|--------------|------------------|-----------|------|
| DENV-2   | Cosmopolitan | MT856316         | China     | 2018 |
| Serotype | Genotype     | Accession Number | Country   | Year |
| DENV-2   | Cosmopolitan | MN955678         | Thailand  | 2018 |
| DENV-2   | Cosmopolitan | MN955679         | Thailand  | 2018 |
| DENV-2   | Cosmopolitan | LC410191         | Thailand  | 2017 |
| DENV-2   | Cosmopolitan | MN915185         | China     | 2019 |
| DENV-2   | Cosmopolitan | MN923117         | China     | 2019 |
| DENV-2   | Cosmopolitan | MN982889         | Indonesia | 2019 |
| DENV-2   | Cosmopolitan | KT781569         | Singapore | 2015 |
| DENV-2   | Cosmopolitan | MN955685         | Thailand  | 2018 |
| DENV-2   | Cosmopolitan | MW018171         | Thailand  | 2019 |
| DENV-2   | Cosmopolitan | MN955669         | Thailand  | 2018 |
| DENV-2   | Cosmopolitan | MN955670         | Thailand  | 2018 |
| DENV-2   | Cosmopolitan | MN955673         | Thailand  | 2018 |
| DENV-2   | Cosmopolitan | LC410190         | Thailand  | 2016 |
| DENV-2   | Cosmopolitan | KJ806776         | Malaysia  | 2013 |
| DENV-2   | Cosmopolitan | MG895076.1       | Malaysia  | 2015 |
| DENV-2   | Cosmopolitan | MK780867         | Thailand  | 2016 |
| DENV-2   | Cosmopolitan | MN955674         | Thailand  | 2018 |
| DENV-2   | Cosmopolitan | MN955684         | Thailand  | 2018 |
| DENV-2   | Cosmopolitan | MN955686         | Thailand  | 2018 |
| DENV-2   | Cosmopolitan | MK780860         | Thailand  | 2015 |
| DENV-2   | Cosmopolitan | MK780863         | Thailand  | 2015 |
| DENV-2   | Cosmopolitan | MK780868         | Thailand  | 2016 |
| DENV-2   | Cosmopolitan | MK780865         | Thailand  | 2015 |
| DENV-2   | Cosmopolitan | MK780869         | Thailand  | 2016 |
| DENV-2   | Cosmopolitan | MW512451.1       | Singapore | 2016 |
| DENV-2   | Cosmopolitan | MG840593         | China     | 2016 |
| DENV-2   | Cosmopolitan | MG840610         | China     | 2016 |
| DENV-2   | Cosmopolitan | MK780861         | Thailand  | 2015 |
| DENV-2   | Cosmopolitan | MK780862         | Thailand  | 2015 |
| DENV-2   | Cosmopolitan | MK780864         | Thailand  | 2015 |
| DENV-2   | Cosmopolitan | MK780866         | Thailand  | 2016 |
| DENV-2   | Cosmopolitan | MN018348         | China     | 2016 |
| DENV-2   | Cosmopolitan | MT377729         | Indonesia | 2020 |
| DENV-2   | Cosmopolitan | MW362792         | Indonesia | 2019 |
| DENV-2   | Cosmopolitan | MG840602         | China     | 2016 |
| DENV-2   | Cosmopolitan | KY006141         | Indonesia | 2015 |
| DENV-2   | Cosmopolitan | MN955675         | Thailand  | 2018 |
| DENV-2   | Cosmopolitan | MH178414         | Indonesia | 2016 |
| DENV-2   | Cosmopolitan | MG677996         | China     | 2017 |
| DENV-2   | Cosmopolitan | MH173165         | Indonesia | 2016 |
| DENV-2   | Cosmopolitan | MT252646         | Singapore | 2016 |
| DENV-2   | Cosmopolitan | MN955683         | Thailand  | 2018 |
| DENV-2   | Cosmopolitan | MT252649         | Singapore | 2016 |
| DENV-2   | Cosmopolitan | KT781537         | Thailand  | 2012 |
| DENV-2   | Cosmopolitan | KT781538         | Thailand  | 2012 |
| DENV-2   | Cosmopolitan | KM216709         | Indonesia | 2011 |
| DENV-2   | Cosmopolitan | MG737916         | China     | 2015 |
| DENV-2   | Cosmopolitan | KT781568         | Indonesia | 2015 |



| DENV-2   | Cosmopolitan | GQ398258         | Indonesia           | 1975 |
|----------|--------------|------------------|---------------------|------|
| DENV-3   | I            | MG840516         | China, Philippines  | 2017 |
| DENV-3   | I            | MH729990         | Philippines         | 2016 |
| Serotype | Genotype     | Accession Number | Country             | Year |
| DENV-3   | I            | MH729987         | Philippines         | 2015 |
| DENV-3   | I            | MG895291         | Taiwan, Philippines | 2016 |
| DENV-3   | I            | JQ920486         | New Caledonia       | 1996 |
| DENV-3   | I            | MH173168         | Indonesia           | 2016 |
| DENV-3   | I            | KY006146         | Indonesia           | 2015 |
| DENV-3   | I            | LC436665         | Bangladesh          | 2017 |
| DENV-3   | I            | LC436676         | Bangladesh          | 2017 |
| DENV-3   | I            | LC436677         | Bangladesh          | 2017 |
| DENV-3   | I            | MG840504         | China, Malaysia     | 2015 |
| DENV-3   | I            | MG895255         | Taiwan, Malaysia    | 2015 |
| DENV-3   | I            | KY495820         | Malaysia            | 2016 |
| DENV-3   | I            | MT377730         | Indonesia           | 2019 |
| DENV-3   | I            | MG895279         | Taiwan, Indonesia   | 2016 |
| DENV-3   | I            | MG895236         | Taiwan, Indonesia   | 2015 |
| DENV-3   | I            | MW295815         | China, Myanmar      | 2020 |
| DENV-3   | I            | MF598866         | China               | 2016 |
| DENV-3   | I            | MH594462         | Vietnam             | 2018 |
| DENV-3   | I            | MG895290         | Taiwan, Indonesia   | 2016 |
| DENV-3   | I            | MH036414         | Indonesia           | 2015 |
| DENV-3   | I            | MG840488         | China, Indonesia    | 2015 |
| DENV-3   | I            | MG840515         | China, Indonesia    | 2017 |
| DENV-3   | I            | MW362802         | Indonesia           | 2019 |
| DENV-3   | I            | EU081223         | Singapore           | 2005 |
| DENV-3   | I            | MG895275         | Taiwan, Indonesia   | 2016 |
| DENV-3   | I            | MW362794         | Indonesia           | 2019 |
| DENV-3   | I            | MH729991         | Indonesia           | 2017 |
| DENV-3   | I            | MT122202         | Indonesia           | 2017 |
| DENV-3   | I            | MW362803         | Indonesia           | 2019 |
| DENV-3   | I            | MG895281         | Taiwan, Indonesia   | 2016 |
| DENV-3   | I            | KY709189         | Indonesia           | 2015 |
| DENV-3   | I            | MK780880         | Thailand            | 2015 |
| DENV-3   | I            | MK780881         | Thailand            | 2015 |
| DENV-3   | I            | MK780882         | Thailand            | 2016 |
| DENV-3   | I            | KY709193         | Indonesia           | 2015 |
| DENV-3   | I            | MG840500         | China               | 2015 |
| DENV-3   | I            | MG895286         | Taiwan, Indonesia   | 2016 |
| DENV-3   | II           | KT424097         | Thailand            | 2014 |
| DENV-3   | II           | KT758791         | Thailand            | 2013 |
| DENV-3   | II           | FJ687448         | Thailand            | 2001 |
| DENV-3   | II           | GQ868593         | Thailand            | 1973 |
| DENV-3   | III          | MW418185         | India               | 2017 |
| DENV-3   | III          | MN915209         | China               | 2019 |
| DENV-3   | III          | MG840511         | China, Indonesia    | 2017 |
| DENV-3   | III          | MN253132         | India               | 2018 |
| DENV-3   | III          | MH594941         | India               | 2017 |
| DENV-3   | III          | KY234179         | Thailand            | 2015 |
| DENV-3   | III          | MN018378         | China               | 2015 |

| DENV-3   | III      | JF968092         | Thailand          | 2010 |
|----------|----------|------------------|-------------------|------|
| DENV-3   | III      | MK780887         | Thailand          | 2015 |
| DENV-3   | III      | KX357894         | Myanmar           | 2015 |
| DENV-3   | III      | MW946839         | Thailand          | 2011 |
| Serotype | Genotype | Accession Number | Country           | Year |
| DENV-3   | III      | MW946808         | Thailand          | 2010 |
| DENV-3   | III      | KT758784         | Thailand          | 2015 |
| DENV-3   | III      | KY234177         | Thailand          | 2015 |
| DENV-3   | III      | MG895251         | Taiwan, Thailand  | 2015 |
| DENV-3   | III      | MG895254         | Taiwan, Thailand  | 2015 |
| DENV-3   | III      | MG895271         | Taiwan, Thailand  | 2016 |
| DENV-3   | III      | MW320451         | Myanmar           | 2019 |
| DENV-3   | III      | MT815453         | China             | 2019 |
| DENV-3   | III      | KY495823         | Thailand          | 2015 |
| DENV-3   | III      | MG895241         | Taiwan, Thailand  | 2015 |
| DENV-3   | III      | MK780884         | Thailand          | 2015 |
| DENV-3   | III      | MK780883         | Thailand          | 2015 |
| DENV-3   | III      | MK780885         | Thailand          | 2015 |
| DENV-3   | III      | MW946662         | Thailand          | 2013 |
| DENV-3   | III      | KY234178         | Thailand          | 2015 |
| DENV-3   | III      | KY234176         | Thailand          | 2015 |
| DENV-3   | III      | LC410195         | Thailand          | 2017 |
| DENV-3   | III      | LC410192         | Thailand          | 2016 |
| DENV-3   | III      | LC410193         | Thailand          | 2016 |
| DENV-3   | III      | MG895247         | Taiwan, Thailand  | 2015 |
| DENV-3   | III      | MG895240         | Taiwan, Thailand  | 2015 |
| DENV-3   | III      | MK780886         | Thailand          | 2015 |
| DENV-3   | III      | MG840498         | China, Thailand   | 2015 |
| DENV-3   | III      | MN453624         | Singapore         | 2016 |
| DENV-3   | III      | MN018367         | China             | 2015 |
| DENV-3   | III      | MG840512         | China, Malaysia   | 2016 |
| DENV-3   | III      | MG840503         | China, Malaysia   | 2015 |
| DENV-3   | III      | MG895249         | China, Malaysia   | 2015 |
| DENV-3   | III      | MG895232         | Taiwan, Singapore | 2015 |
| DENV-3   | III      | MG895284         | Taiwan, Thailand  | 2016 |
| DENV-3   | III      | MG895243         | Taiwan, Thailand  | 2015 |
| DENV-3   | III      | KY234174         | Thailand          | 2015 |
| DENV-3   | III      | MF142763         | Thailand          | 2015 |
| DENV-3   | III      | KY234175         | Thailand          | 2015 |
| DENV-3   | III      | MW946741         | Thailand          | 2014 |
| DENV-3   | III      | MW946693         | Thailand          | 2012 |
| DENV-3   | III      | LC410194         | Thailand          | 2016 |
| DENV-3   | III      | MW946881         | Thailand          | 2014 |
| DENV-3   | III      | MG895245         | Taiwan, Thailand  | 2015 |
| DENV-3   | III      | MG895235         | Taiwan, Thailand  | 2015 |
| DENV-3   | III      | GQ199887         | Sri Lanka         | 1983 |
| DENV-3   | III      | NC001475         | Sri Lanka         | 2000 |
| DENV-3   | III      | MG721059         | India             | 2016 |
| DENV-3   | III      | MG895287         | Taiwan            | 2016 |
| DENV-3   | III      | MG895250         | Taiwan, Malaysia  | 2015 |
| DENV-3   | III      | MG895269         | Taiwan            | 2016 |

| DENV-3   | III      | MK780888         | Thailand          | 2016 |
|----------|----------|------------------|-------------------|------|
| DENV-3   | IV       | L11433           | Puerto Rico       | 1963 |
| DENV-3   | IV       | L11434           | Puerto Rico       | 1977 |
| DENV-3   | V        | KM190937         | Philippines       | 1964 |
| DENV-3   | V        | EF629370         | Brazil            | 2002 |
| Serotype | Genotype | Accession Number | Country           | Year |
| DENV-3   | V        | JQ922554         | USA               | 1963 |
| DENV-4   | I        | AY947539.1       | Philippines       | 1956 |
| DENV-4   | I        | KR011349         | Philippines       | 1956 |
| DENV-4   | I        | AY618991         | Thailand_Bangkok  | 1977 |
| DENV-4   | I        | FJ196850         | China             | 1990 |
| DENV-4   | I        | AY618990.1       | Thailand_Bangkok  | 1991 |
| DENV-4   | I        | AY618968.1       | Thailand_Bangkok  | 1992 |
| DENV-4   | I        | AY618992         | Thailand_Bangkok  | 2001 |
| DENV-4   | I        | MW945732.1       | Thailand          | 2006 |
| DENV-4   | I        | JN638570         | Cambodia          | 2008 |
| DENV-4   | I        | KF041260         | Pakistan          | 2009 |
| DENV-4   | I        | KU509287         | India             | 2009 |
| DENV-4   | I        | MW945645.1       | Thailand          | 2010 |
| DENV-4   | I        | MW945505.1       | Thailand          | 2011 |
| DENV-4   | I        | JQ513345         | Brazil            | 2011 |
| DENV-4   | I        | KP792537.2       | Singapore         | 2011 |
| DENV-4   | I        | KR922405.1       | Thailand          | 2011 |
| DENV-4   | I        | MN449005.1       | Thailand          | 2012 |
| DENV-4   | I        | MW945637.1       | Thailand          | 2012 |
| DENV-4   | I        | MG601754.1       | China             | 2013 |
| DENV-4   | I        | KJ470764.1       | Myanmar           | 2013 |
| DENV-4   | I        | KJ470765.1       | Myanmar           | 2013 |
| DENV-4   | I        | MK780900.1       | Southern Thailand | 2015 |
| DENV-4   | I        | KX845005         | India             | 2015 |
| DENV-4   | I        | KX845005         | India             | 2015 |
| DENV-4   | I        | MK780894.1       | Southern Thailand | 2016 |
| DENV-4   | I        | LC410197.1       | Thailand          | 2016 |
| DENV-4   | II       | NC_002640        |                   |      |
| DENV-4   | IIA      | JQ915083         | French Polynesia  | 2009 |
| DENV-4   | IIA      | KC762694         | Indonesia         | 2007 |
| DENV-4   | IIA      | KU523871.1       | Philippines       | 2014 |
| DENV-4   | IIB      | FJ639773         | Venezuela         | 2001 |
| DENV-4   | IIB      | AF326573         | Dominican         | 1981 |
| DENV-4   | IIB      | AY618993.1       | Thailand_Bangkok  | 2000 |
| DENV-4   | IIB      | FJ850059         | Puerto Rico       | 1998 |
| DENV-4   | IIB      | GQ868585         | Colombia          | 2005 |
| DENV-4   | IIB      | HQ332176         | Venezuela         | 2007 |
| DENV-4   | IIB      | JF262782         | Haiti             | 1994 |
| DENV-4   | IIB      | KP188566         | Brazil            | 2013 |
| DENV-4   | IIB      | KT749994.1       | Thailand          | 2011 |
| DENV-4   | IIB      | MZ505611.1       | Thailand          | 2015 |
| DENV-4   | III      | AY618988         | Thailand          | 1997 |
| DENV-4   | III      | AY618989.1       | Thailand_Bangkok  | 1997 |
| DENV-4   | III      | KY586945.1       | Thailand_Bangkok  | 1998 |
| DENV-4   | III      | KY586946         | Thailand          | 1998 |

| DENV-4   | I        | AY618968.1       | Thailand_Bangkok      | 1992 |
|----------|----------|------------------|-----------------------|------|
| DENV-4   | I        | MW945505.1       | Thailand              | 2011 |
| DENV-4   | I        | MW945637.1       | Thailand              | 2012 |
| DENV-4   | I        | AY618990.1       | Thailand_Bangkok      | 1991 |
| DENV-4   | I        | AY618991         | Thailand_Bangkok      | 1977 |
| DENV-4   | I        | AY618992         | Thailand_Bangkok      | 2001 |
| Serotype | Genotype | Accession Number | Country               | Year |
| DENV-4   | I        | AY947539.1       | Philippines           | 1956 |
| DENV-4   | I        | FJ196850         | China                 | 1990 |
| DENV-4   | I        | JN638570         | Cambodia              | 2008 |
| DENV-4   | I        | JQ513345         | Brazil                | 2011 |
| DENV-4   | I        | KF041260         | Pakistan              | 2009 |
| DENV-4   | I        | KJ470764.1       | Myanmar               | 2013 |
| DENV-4   | I        | KP792537.2       | Singapore             | 2011 |
| DENV-4   | I        | KR011349         | Philippines           | 1956 |
| DENV-4   | I        | KR922405.1       | Thailand              | 2011 |
| DENV-4   | I        | KU509287         | India                 | 2009 |
| DENV-4   | I        | KX845005         | India                 | 2015 |
| DENV-4   | I        | KY234182.1       | Thailand              | 2013 |
| DENV-4   | I        | KY451945.1       | Thailand_Chanthaburi  | 2013 |
| DENV-4   | I        | KY851724.1       | Thailand              | 2013 |
| DENV-4   | I        | LC410197.1       | Thailand              | 2016 |
| DENV-4   | I        | LC410199.1       | Thailand              | 2016 |
| DENV-4   | I        | LC410201.1       | Thailand              | 2016 |
| DENV-4   | I        | LC410203.1       | Thailand              | 2017 |
| DENV-4   | I        | MG601754.1       | China                 | 2013 |
| DENV-4   | I        | MG895367.1       | Taiwan, Thailand      | 2015 |
| DENV-4   | I        | MG895369.1       | Taiwan, Thailand      | 2015 |
| DENV-4   | I        | MG895372.1       | Taiwan, Thailand      | 2015 |
| DENV-4   | I        | MG895391.1       | Taiwan, Thailand      | 2016 |
| DENV-4   | I        | MH893694.1       | Thailand              | 2016 |
| DENV-4   | I        | MK780891.1       | Southern Thailand     | 2016 |
| DENV-4   | I        | MK780894.1       | Southern Thailand     | 2016 |
| DENV-4   | I        | MK780896.1       | Southern Thailand     | 2016 |
| DENV-4   | I        | MK780897.1       | Southern Thailand     | 2016 |
| DENV-4   | I        | MN955689.1       | Thailand              | 2018 |
| DENV-4   | I        | MN955691.1       | Thailand              | 2018 |
| DENV-4   | I        | MN955693.1       | Thailand              | 2018 |
| DENV-4   | I        | MT122862.1       | Laos_Vientiane        | 2016 |
| DENV-4   | I        | MT122879.1       | Laos_Attapeu          | 2018 |
| DENV-4   | I        | MT122896.1       | Laos_Vientiane        | 2019 |
| DENV-4   | I        | MW945624.1       | Thailand              | 2014 |
| DENV-4   | I        | MZ505612.1       | Thailand              | 2015 |
| DENV-4   | I        | MT524506.1       | Northeastern Thailand | 2016 |
| DENV-4   | I        | MT524511.1       | Northeastern Thailand | 2017 |
| DENV-4   | I        | MT524512.1       | Northeastern Thailand | 2016 |
| DENV-4   | I        | MT524513.1       | Northeastern Thailand | 2016 |
| DENV-4   | I        | MW793459.1       | Thailand              | 2021 |
| DENV-4   | I        | MW793460.1       | Thailand              | 2021 |
| DENV-4   | I        | MN955687.1       | Thailand              | 2018 |
| DENV-4   | I        | MN955688.1       | Thailand              | 2018 |

| DENV-4   | I        | MN955690.1       | Thailand          | 2018 |
|----------|----------|------------------|-------------------|------|
| DENV-4   | I        | MN955692.1       | Thailand          | 2018 |
| DENV-4   | I        | MK780889.1       | Southern Thailand | 2015 |
| DENV-4   | I        | MK780892.1       | Southern Thailand | 2016 |
| DENV-4   | I        | MK780893.1       | Southern Thailand | 2016 |
| DENV-4   | I        | MK780895.1       | Southern Thailand | 2016 |
| DENV-4   | I        | MK780900.1       | Southern Thailand | 2015 |
| Serotype | Genotype | Accession Number | Country           | Year |
| DENV-4   | I        | MK780902.1       | Southern Thailand | 2015 |
| DENV-4   | I        | KT825074.1       | Thailand          | 2015 |
| DENV-4   | I        | MT122877.1       | Laos              | 2017 |
| DENV-4   | I        | MT122869.1       | Laos              | 2017 |
| DENV-4   | I        | MT122865.1       | Laos              | 2017 |
| DENV-4   | I        | MT122873.1       | Laos              | 2017 |
| DENV-4   | I        | MT122881.1       | Laos              | 2018 |
| DENV-4   | I        | MT122878.1       | Laos              | 2017 |
| DENV-4   | I        | MT122857.1       | Laos              | 2015 |
| DENV-4   | I        | MT122894.1       | Laos              | 2019 |
| DENV-4   | I        | MT122895.1       | Laos              | 2019 |
| DENV-4   | I        | MT122884.1       | Laos              | 2018 |
| DENV-4   | I        | MT122893.1       | Laos              | 2019 |
| DENV-4   | I        | MT122886.1       | Laos              | 2018 |
| DENV-4   | I        | MT122875.1       | Laos              | 2017 |
| DENV-4   | I        | MT122863.1       | Laos              | 2016 |
| DENV-4   | I        | MT122858.1       | Laos              | 2016 |
| DENV-4   | I        | MT122872.1       | Laos              | 2017 |
| DENV-4   | I        | MK629501.1       | Indonesia         | 2015 |
| DENV-4   | I        | KY427081.1       | Indonesia         | 2016 |
| DENV-4   | I        | MF598872.1       | China             | 2016 |
| DENV-4   | I        | MF598870.1       | China             | 2016 |
| DENV-4   | I        | MF598869.1       | China             | 2016 |
| DENV-4   | I        | MG895395.1       | Myanmar           | 2016 |
| DENV-4   | I        | MH893696.1       | China             | 2016 |
| DENV-4   | I        | MG895333.1       | Taiwan, Thailand  | 2013 |
| DENV-4   | I        | MK614088.1       | China             | 2019 |
| DENV-4   | I        | MW295825.1       | China             | 2017 |
| DENV-4   | I        | KR051895.1       | Myanmar           | 2013 |
| DENV-4   | I        | MW945532.1       | Thailand          | 2013 |
| DENV-4   | I        | MG895351.1       | Taiwan, Myanmar   | 2014 |
| DENV-4   | I        | MH893695.1       | Myanmar           | 2016 |

**Table S4.** Characteristics of DENV samples analyzed in the present study from Hospital for Tropical Diseases, Bangkok, Thailand, during 2018–2020.

| ID               | Collection Date    | NS1 Ag   | DENV IgM | DENV IgG | Serotype | Genotype | Accession No. |
|------------------|--------------------|----------|----------|----------|----------|----------|---------------|
| DV1I-PW-03-2018  | November 28, 2018  | NA       | NA       | NA       | 1        | I        | MZ618966      |
| DV1I-PW-05-2018  | December 12, 2018  | NA       | NA       | NA       | 1        | I        | MZ618967      |
| DV1I-PW-07-2019  | January 11, 2019   | NA       | NA       | NA       | 1        | I        | MZ618968      |
| DV1I-PW-08-2019  | January 16, 2019   | NA       | NA       | NA       | 1        | I        | MZ618969      |
| DV1I-PW-09-2019  | January 15, 2019   | NA       | NA       | NA       | 1        | I        | MZ618970      |
| DV1I-TM18-18     | May 25, 2018       | Positive | NA       | NA       | 1        | I        | MZ618971      |
| DV1I-TM18-20     | May 28, 2018       | Positive | NA       | NA       | 1        | I        | MZ618972      |
| DV1I-TM18-57     | August 29, 2018    | Positive | NA       | NA       | 1        | I        | MZ618973      |
| DV1I-TM18-71     | September 30, 2018 | Positive | NA       | NA       | 1        | I        | MZ618974      |
| DV1I-TM18-75     | October 10, 2018   | Positive | NA       | NA       | 1        | I        | MZ618975      |
| DV1I-TM18-78     | October 19, 2018   | Positive | Negative | Negative | 1        | I        | MZ618976      |
| DV1I-TM18-79     | October 24, 2018   | Positive | NA       | NA       | 1        | I        | MZ618977      |
| DV1I-TM19-03     | November 13, 2019  | Positive | Positive | Positive | 1        | I        | MZ618978      |
| DV1I-TM19-15     | November 19, 2019  | Positive | NA       | NA       | 1        | I        | MZ618979      |
| DV1I-TM19-17     | November 20, 2019  | Positive | NA       | NA       | 1        | I        | MZ618980      |
| DV1I-TM19-24     | November 22, 2019  | Positive | NA       | NA       | 1        | I        | MZ618981      |
| DV1I-TM19-28     | November 25, 2019  | Positive | Negative | Negative | 1        | I        | MZ618982      |
| DV1I-TM19-36     | November 27, 2019  | Positive | NA       | NA       | 1        | I        | MZ618983      |
| DV1I-TM19-45     | December 5, 2019   | Positive | Positive | Positive | 1        | I        | MZ618984      |
| DV1I-TM19-50     | December 10, 2019  | Positive | Negative | Negative | 1        | I        | MZ618985      |
| DV1I-TM19-52     | December 10, 2019  | Positive | NA       | NA       | 1        | I        | MZ618986      |
| DV1I-TM19-54     | December 11, 2019  | Positive | NA       | NA       | 1        | I        | MZ618987      |
| DV1I-TM19-60     | December 12, 2019  | Positive | NA       | NA       | 1        | I        | MZ618988      |
| DV1I-TM19-69     | December 22, 2019  | Positive | Positive | Positive | 1        | I        | MZ618989      |
| DV1I-TM19-75     | December 28, 2019  | Positive | NA       | NA       | 1        | I        | MZ618990      |
| DV1I-TM19-79     | December 30, 2019  | Positive | NA       | NA       | 1        | I        | MZ618991      |
| DV1I-TM20-08     | January 11, 2020   | Positive | NA       | NA       | 1        | I        | MZ618992      |
| DV1I-TM20-12     | January 12, 2020   | Positive | NA       | NA       | 1        | I        | MZ618993      |
| DV1I-TM20-16     | February 5, 2020   | Positive | Negative | Negative | 1        | I        | MZ618994      |
| DV1I-TM20-20     | February 16, 2020  | Positive | NA       | NA       | 1        | I        | MZ618995      |
| DV1I-TM20-21     | February 16, 2020  | Positive | Negative | Negative | 1        | I        | MZ618996      |
| DV1I-TM20-22     | June 11, 2020      | Positive | NA       | NA       | 1        | I        | MZ618997      |
| DV1I-TM20-23     | June 21, 2020      | Positive | NA       | NA       | 1        | I        | MZ618998      |
| DV1I-TM20-24     | June 27, 2020      | Positive | NA       | NA       | 1        | I        | MZ618999      |
| DV1I-TM20-25     | July 5, 2020       | Positive | NA       | NA       | 1        | I        | MZ619000      |
| DV1I-TM20-30     | July 21, 2020      | Positive | NA       | NA       | 1        | I        | MZ619001      |
| DV1I-TM20-32     | July 23, 2020      | Positive | NA       | NA       | 1        | I        | MZ619002      |
| DV1I-TM20-44     | August 17, 2020    | Positive | NA       | NA       | 1        | I        | MZ619003      |
| DV1I-TM20-45     | August 18, 2020    | Positive | Positive | Negative | 1        | I        | MZ619004      |
| DV1I-TM20-47     | August 19, 2020    | Positive | NA       | NA       | 1        | I        | MZ619005      |
| DV1I-TM19-09-NGS | November 16, 2019  | Positive | Negative | Negative | 1        | I        | MZ619036      |
| DV1I-TM19-12-NGS | November 19, 2019  | Positive | NA       | NA       | 1        | I        | MZ619037      |
| DV1I-TM19-33-NGS | November 27, 2019  | Positive | NA       | NA       | 1        | I        | MZ619038      |
| DV1I-TM19-40-NGS | November 29, 2019  | Positive | NA       | NA       | 1        | I        | MZ619039      |
| DV1I-TM19-70-NGS | December 23, 2019  | Positive | NA       | NA       | 1        | I        | MZ619040      |
| DV1I-TM19-74-NGS | December 28, 2019  | Positive | Positive | Positive | 1        | I        | MZ619041      |
| DV2A-PW12        | November 25, 2018  | NA       | NA       | NA       | 2        | Asian I  | MZ636761      |
| DV2A-PW14        | December 1, 2018   | NA       | NA       | NA       | 2        | Asian I  | MZ636762      |

| DV2C-TM18-14     | May 14, 2018       | Positive | NA       | NA       | 2        | Cosmopolitan | MZ636763      |
|------------------|--------------------|----------|----------|----------|----------|--------------|---------------|
| ID               | Collection Date    | NS1 Ag   | DENV IgM | DENV IgG | Serotype | Genotype     | Accession No. |
| DV2C-TM18-15     | May 21, 2018       | Positive | Negative | Negative | 2        | Cosmopolitan | MZ636764      |
| DV2C-TM18-16     | May 22, 2018       | Positive | NA       | NA       | 2        | Cosmopolitan | MZ636765      |
| DV2C-TM18-33     | July 5, 2018       | Positive | NA       | NA       | 2        | Cosmopolitan | MZ636766      |
| DV2C-TM18-36     | July 13, 2018      | Positive | Negative | Negative | 2        | Cosmopolitan | MZ636767      |
| DV2C-TM18-47     | August 13, 2018    | Positive | Negative | Negative | 2        | Cosmopolitan | MZ636768      |
| DV2A-TM18-66     | September 17, 2018 | Positive | NA       | NA       | 2        | Asian I      | MZ636769      |
| DV2C-TM18-86     | November 16, 2018  | Positive | NA       | NA       | 2        | Cosmopolitan | MZ636770      |
| DV2C-TM19-11     | November 19, 2019  | Positive | NA       | NA       | 2        | Cosmopolitan | MZ636771      |
| DV2C-TM19-16     | November 19, 2019  | Positive | Negative | Negative | 2        | Cosmopolitan | MZ636772      |
| DV2C-TM19-19     | November 20, 2019  | Positive | Positive | Positive | 2        | Cosmopolitan | MZ636773      |
| DV2C-TM19-23     | November 21, 2019  | Positive | NA       | NA       | 2        | Cosmopolitan | MZ636774      |
| DV2C-TM19-29     | November 25, 2019  | Positive | NA       | NA       | 2        | Cosmopolitan | MZ636775      |
| DV2C-TM19-31     | November 26, 2019  | Positive | NA       | NA       | 2        | Cosmopolitan | MZ636776      |
| DV2C-TM19-32     | November 26, 2019  | Positive | NA       | NA       | 2        | Cosmopolitan | MZ636777      |
| DV2C-TM19-35     | November 27, 2019  | Positive | Positive | Positive | 2        | Cosmopolitan | MZ636778      |
| DV2C-TM19-42     | December 1, 2019   | Positive | NA       | NA       | 2        | Cosmopolitan | MZ636779      |
| DV2A-TM19-43     | December 3, 2019   | Positive | NA       | NA       | 2        | Asian I      | MZ636780      |
| DV2C-TM19-46     | December 5, 2019   | Positive | NA       | NA       | 2        | Cosmopolitan | MZ636781      |
| DV2A-TM19-63     | December 16, 2019  | Positive | NA       | NA       | 2        | Asian I      | MZ636782      |
| DV2C-TM19-73     | December 28, 2019  | Positive | NA       | NA       | 2        | Cosmopolitan | MZ636783      |
| DV2C-TM19-81     | December 31, 2019  | Positive | NA       | NA       | 2        | Cosmopolitan | MZ636784      |
| DV2C-TM20-11     | January 12, 2020   | Positive | NA       | NA       | 2        | Cosmopolitan | MZ636785      |
| DV2A-TM20-33     | July 27, 2020      | Positive | NA       | NA       | 2        | Asian I      | MZ636786      |
| DV2C-TM20-36     | August 3, 2020     | Positive | NA       | NA       | 2        | Cosmopolitan | MZ636787      |
| DV2C-TM20-37     | August 8, 2020     | Positive | Negative | Negative | 2        | Cosmopolitan | MZ636788      |
| DV2A-TM20-43     | August 16, 2020    | Positive | Negative | Negative | 2        | Asian I      | MZ636789      |
| DV2C-TM20-55     | August 29, 2020    | Positive | Negative | Negative | 2        | Cosmopolitan | MZ636790      |
| DV2C-TM20-56     | August 31, 2020    | Positive | Negative | Negative | 2        | Cosmopolitan | MZ636791      |
| DV2C-TM20-65     | September 22, 2020 | Positive | NA       | NA       | 2        | Cosmopolitan | MZ636792      |
| DV2C-TM20-74     | October 3, 2020    | Positive | NA       | NA       | 2        | Cosmopolitan | MZ636793      |
| DV2A-TM20-83     | October 9, 2020    | Positive | NA       | NA       | 2        | Asian I      | MZ636794      |
| DV2A-TM20-89     | October 20, 2020   | Positive | NA       | NA       | 2        | Asian I      | MZ636795      |
| DV2C-TM20-93     | October 26, 2020   | Positive | Negative | Positive | 2        | Cosmopolitan | MZ636796      |
| DV2A-TM20-94     | October 30, 2020   | Positive | NA       | NA       | 2        | Asian I      | MZ636797      |
| DV2A-TM20-96     | November 3, 2020   | Positive | NA       | NA       | 2        | Asian I      | MZ636798      |
| DV2A-TM20-101    | November 13, 2020  | Positive | NA       | NA       | 2        | Asian I      | MZ636799      |
| DV2A-TM19-13-NGS | November 19, 2019  | Positive | NA       | NA       | 2        | Asian I      | MZ636801      |
| DV2C-TM19-26-NGS | November 24, 2019  | Positive | NA       | NA       | 2        | Cosmopolitan | MZ636802      |
| DV2C-TM19-37-NGS | November 28, 2019  | Positive | NA       | NA       | 2        | Cosmopolitan | MZ636803      |
| DV2C-TM19-41-NGS | November 30, 2019  | Positive | NA       | NA       | 2        | Cosmopolitan | MZ636804      |
| DV2C-TM19-80-NGS | December 30, 2019  | Positive | NA       | NA       | 2        | Cosmopolitan | MZ636805      |
| DV3I-PW23        | October 10, 2018   | NA       | NA       | NA       | 3        | I            | MZ636813      |
| DV3III-TM18-12   | May 8, 2018        | Positive | Negative | Negative | 3        | III          | MZ636814      |
| DV3I-TM18-22     | June 4, 2018       | Positive | Negative | Negative | 3        | I            | MZ636815      |
| DV3I-TM18-34     | July 7, 2018       | Positive | Negative | Negative | 3        | I            | MZ636816      |
| DV3I-TM20-02     | January 2, 2020    | Positive | NA       | NA       | 3        | I            | MZ636817      |
| DV3III-TM20-07   | January 10, 2020   | Positive | NA       | NA       | 3        | III          | MZ636818      |
| DV3I-TM20-09     | January 11, 2020   | Positive | NA       | NA       | 3        | I            | MZ636819      |
| DV3I-TM20-10     | January 11, 2020   | Positive | NA       | NA       | 3        | I            | MZ636820      |

| DV4I-PW-11   | December 1, 2018   | NA       | NA       | NA       | 4        | I        | MZ636822      |
|--------------|--------------------|----------|----------|----------|----------|----------|---------------|
| DV4I-PW-34   | November 1, 2018   | NA       | NA       | NA       | 4        | I        | MZ636823      |
| ID           | Collection Date    | NS1 Ag   | DENV IgM | DENV IgG | Serotype | Genotype | Accession No. |
| DV4I-PW-37   | November 1, 2018   | NA       | NA       | NA       | 4        | I        | MZ636824      |
| DV4I-PW-44   | December 1, 2018   | NA       | NA       | NA       | 4        | I        | MZ636825      |
| DV4I-TM18-7  | March 27, 2018     | Positive | NA       | NA       | 4        | I        | MZ636826      |
| DV4I-TM19-76 | December 29, 2019  | Positive | NA       | NA       | 4        | I        | MZ636827      |
| DV4I-TM20-5  | January 9, 2020    | Positive | NA       | NA       | 4        | I        | MZ636828      |
| DV4I-TM20-53 | August 29, 2020    | Positive | Positive | Positive | 4        | I        | MZ636829      |
| DV4I-TM20-59 | September 11, 2020 | Positive | NA       | NA       | 4        | I        | MZ636830      |
| DV4I-TM20-64 | September 18, 2020 | Positive | Negative | Positive | 4        | I        | MZ636831      |
| DV4I-TM20-76 | October 3, 2020    | Positive | NA       | NA       | 4        | I        | MZ636832      |
| DV4I-TM20-90 | October 21, 2020   | Positive | Negative | Negative | 4        | I        | MZ636833      |
| DV4I-TM20-98 | November 9, 2020   | Positive | Negative | Positive | 4        | I        | MZ636834      |

NA, data not available.
